# Supplementary material for: Causal role of blood metabolites in HER-positive and HER-negative breast cancer: a Mendelian randomization (MR) study
Source: publisher site journal article supplement (doi:10.18632/aging.206042), 2024-08-02
Supplement: Supplementary file [file aging-v16i15-206042-supplementary-material-SD2.pdf]

## SUPPLEMENTARY TABLES

**Supplementary Table 1. Genetic data for the MR on the effect of epiandrosterone sulfate levels on malignant neoplasm of breast, HER-positive.**

| SNP                                | beta_X       | se_X        | p_X         | or          | or_lci95    | or_uci95    | F           |
|------------------------------------|--------------|-------------|-------------|-------------|-------------|-------------|-------------|
| rs10822184                         | -0.188421569 | 0.23294118  | 0.418583909 | 0.828265463 | 0.524669739 | 1.307534292 | 20.73820934 |
| rs10964588                         | 0.032182983  | 0.266742083 | 0.903966629 | 1.032706456 | 0.612239642 | 1.741936571 | 21.43573389 |
| rs112881196                        | -0.435423443 | 0.239048617 | 0.068533182 | 0.646990646 | 0.404963341 | 1.033666145 | 28.35063804 |
| rs1165191                          | 0.257408695  | 0.215939321 | 0.23324486  | 1.293573696 | 0.847188233 | 1.975160704 | 24.91289764 |
| rs117209214                        | 0.127939656  | 0.076937053 | 0.096329772 | 1.136484421 | 0.977402274 | 1.321458803 | 55.18570351 |
| rs117907084                        | 0.003556025  | 0.19970231  | 0.985793116 | 1.003562355 | 0.678506987 | 1.484343449 | 20.06779613 |
| rs117976748                        | -0.145734469 | 0.198434995 | 0.462693292 | 0.864387194 | 0.585864315 | 1.275321267 | 20.2000859  |
| rs11932379                         | 0.57928347   | 0.280559558 | 0.038947294 | 1.784759139 | 1.029822788 | 3.09311973  | 21.63336488 |
| rs1335061                          | -0.261670892 | 0.227828544 | 0.25074445  | 0.769764318 | 0.492522646 | 1.203065706 | 20.53411176 |
| rs140628452                        | 0.183972838  | 0.217284855 | 0.397168127 | 1.201983175 | 0.785130387 | 1.840157479 | 20.19661709 |
| rs148982377                        | 0.058740377  | 0.020914412 | 0.004975624 | 1.060499875 | 1.017906564 | 1.104875462 | 1232.653533 |
| rs149982314                        | 0.588319122  | 0.501964201 | 0.241183397 | 1.800958677 | 0.673322603 | 4.817084918 | 20.48065325 |
| rs17586938                         | 0.289261488  | 0.244790928 | 0.237337653 | 1.335440884 | 0.82652201  | 2.157719132 | 21.92739899 |
| rs17834682                         | 0.037573221  | 0.316268616 | 0.905432532 | 1.038288019 | 0.55860467  | 1.929883635 | 21.56000559 |
| rs1939768                          | 0.45061658   | 0.236461542 | 0.05669363  | 1.569279474 | 0.987234142 | 2.494482274 | 34.83365566 |
| rs34445681                         | -0.209590616 | 0.185887977 | 0.259526773 | 0.810916154 | 0.563306693 | 1.167365873 | 22.74255116 |
| rs4314048                          | 0.386768204  | 0.238304444 | 0.104589323 | 1.472215198 | 0.922831603 | 2.348659909 | 20.06542188 |
| rs4961487                          | 0.087461739  | 0.203206663 | 0.666899002 | 1.091400505 | 0.732843343 | 1.625388392 | 26.52156846 |
| rs56225736                         | 0.283035001  | 0.170650237 | 0.097202899 | 1.327151613 | 0.94986115  | 1.854304076 | 38.52168963 |
| rs598997                           | 0.07868796   | 0.224981019 | 0.726523497 | 1.081866683 | 0.696091029 | 1.681440317 | 21.2381214  |
| rs76205362                         | 0.064688883  | 0.17818401  | 0.716570982 | 1.066827064 | 0.752351399 | 1.512750539 | 20.13317837 |
| rs9294747                          | -0.126756    | 0.220332878 | 0.565093039 | 0.880948598 | 0.572004488 | 1.356755843 | 26.37805868 |
| rs949696                           | 0.163540851  | 0.209913237 | 0.43592797  | 1.177673464 | 0.780446495 | 1.777078628 | 20.53960905 |
| rs969114                           | -0.057751433 | 0.159153317 | 0.716704492 | 0.943884537 | 0.690947155 | 1.289415569 | 41.18745558 |
| All - Inverse<br>variance weighted | 0.063053547  | 0.019637758 | 0.001323512 | 1.065083869 | 1.024867709 | 1.106878125 | NA          |
| All - MR Egger                     | 0.062741091  | 0.023725518 | 0.014808268 | 1.06475113  | 1.016371646 | 1.115433486 | NA          |

Abbreviations: F: F-statistic; Beta\_X: genetic effect on Epiandrosterone sulfate levels; SE\_X: standard error of Beta\_X; p\_X: p-value for Beta\_X.

**Supplementary Table 2. Genetic data for the MR on the effect of 5alpha-androstan-3beta,17beta-diol monosulfate (2) levels on malignant neoplasm of breast, HER-positive.**

| SNP         | beta_X       | se_X        | p_X         | or          | or_lci95    | or_uci95    | F           |
|-------------|--------------|-------------|-------------|-------------|-------------|-------------|-------------|
| rs111863675 | -0.009326836 | 0.513639177 | 0.985512535 | 0.990716524 | 0.362018623 | 2.71123961  | 23.07545101 |
| rs112881196 | -0.30581922  | 0.167895557 | 0.068533182 | 0.736519756 | 0.529991393 | 1.023528603 | 48.04621488 |
| rs11663683  | -0.3421822   | 0.194710939 | 0.078852106 | 0.710218791 | 0.484898523 | 1.040239776 | 24.65996095 |
| rs117299048 | -0.331387347 | 0.33877409  | 0.327977559 | 0.717927028 | 0.36958129  | 1.394603115 | 22.85136511 |
| rs117907084 | 0.003197174  | 0.179549622 | 0.985793116 | 1.00320229  | 0.705590607 | 1.426343867 | 20.91978384 |
| rs11807828  | 0.277783356  | 0.261994272 | 0.28902406  | 1.320200152 | 0.789997563 | 2.20624534  | 24.84529912 |
| rs1202220   | 0.293139268  | 0.204683138 | 0.152097665 | 1.340629484 | 0.897591978 | 2.002343446 | 19.88100982 |
| rs138257623 | 0.101011682  | 0.240881413 | 0.674966239 | 1.106289566 | 0.68996398  | 1.773826808 | 23.80669888 |
| rs139943078 | 0.016669697  | 0.486205337 | 0.972649645 | 1.016809412 | 0.392078673 | 2.636974289 | 20.93272933 |

|                                 |              |             |             |             |             |             |             |
|---------------------------------|--------------|-------------|-------------|-------------|-------------|-------------|-------------|
| rs141113556                     | 0.207232641  | 0.552168523 | 0.707432256 | 1.230268749 | 0.416854657 | 3.630908692 | 20.33773588 |
| rs143358204                     | -0.075303679 | 0.268048007 | 0.778761366 | 0.927461793 | 0.548439793 | 1.568422622 | 19.66687909 |
| rs146308324                     | -0.502091443 | 0.253103617 | 0.047284976 | 0.605263461 | 0.368551606 | 0.99400966  | 19.67591162 |
| rs146802218                     | 0.12393409   | 0.211983744 | 0.55879008  | 1.131941262 | 0.747101632 | 1.71501569  | 22.04457795 |
| rs147344701                     | -0.129526678 | 0.225266144 | 0.565295364 | 0.878511151 | 0.564932897 | 1.366147814 | 21.38021978 |
| rs148982377                     | 0.071205907  | 0.025352743 | 0.004975624 | 1.073802307 | 1.021747638 | 1.128508989 | 424.9030325 |
| rs150754448                     | 0.132156646  | 0.214030393 | 0.536926923 | 1.141287083 | 0.750254404 | 1.736126038 | 21.45243931 |
| rs2123886                       | 0.15836279   | 0.154357665 | 0.304916548 | 1.171591159 | 0.865733431 | 1.58550634  | 36.55078129 |
| rs342165                        | 0.146255663  | 0.192725862 | 0.447924777 | 1.157492078 | 0.793352987 | 1.688766453 | 20.43767199 |
| rs35192168                      | -0.060529064 | 0.201004385 | 0.763313036 | 0.941266411 | 0.634766758 | 1.395760642 | 21.44885522 |
| rs4149056                       | 0.422960835  | 0.173259937 | 0.014638855 | 1.52647451  | 1.086945381 | 2.143736449 | 27.01568196 |
| rs548244437                     | 0.542581896  | 0.29577842  | 0.066591649 | 1.720443138 | 0.963537563 | 3.071934823 | 24.45539684 |
| rs56225736                      | 0.291948112  | 0.176024217 | 0.097202899 | 1.339033536 | 0.948323725 | 1.890715968 | 32.08251119 |
| rs6807359                       | 0.086811931  | 0.231770218 | 0.707987476 | 1.090691535 | 0.692492621 | 1.717863829 | 20.08732606 |
| rs6843105                       | 0.107429998  | 0.185915153 | 0.563369293 | 1.113412917 | 0.773396286 | 1.602914762 | 23.44067997 |
| rs7139537                       | 0.099068951  | 0.185554757 | 0.593406002 | 1.104142428 | 0.767498792 | 1.588446152 | 25.17973585 |
| rs75121365                      | 0.120666996  | 0.126305891 | 0.339398079 | 1.128249138 | 0.880828311 | 1.445169394 | 20.73057531 |
| rs772736                        | -0.152966163 | 0.383980642 | 0.690357862 | 0.858158758 | 0.404312081 | 1.82145548  | 21.26363088 |
| rs78424818                      | 0.28440662   | 0.211148087 | 0.177995262 | 1.328973207 | 0.878584113 | 2.010245531 | 20.18660501 |
| rs79728496                      | -0.202806567 | 0.220141111 | 0.356916198 | 0.816436151 | 0.530315512 | 1.256927196 | 19.94569702 |
| rs9422240                       | 0.20860023   | 0.218748032 | 0.340281279 | 1.231952403 | 0.802401708 | 1.891454998 | 19.96396173 |
| rs9933711                       | 0.119312043  | 0.213005107 | 0.57538599  | 1.126721449 | 0.742169247 | 1.710527928 | 22.56486913 |
| All - Inverse variance weighted | 0.07112927   | 0.021948953 | 0.0011925   | 1.073720017 | 1.028508118 | 1.120919373 | NA          |
| All - MR Egger                  | 0.060598849  | 0.028310409 | 0.040851566 | 1.062472617 | 1.005123527 | 1.123093859 | NA          |

Abbreviations: F: F-statistic; Beta\_X: genetic effect on 5alpha-androstan-3beta,17beta-diol monosulfate (2) levels; SE\_X: standard error of Beta\_X; p\_X: p-value for Beta\_X.

**Supplementary Table 3. Genetic data for the MR on the effect of glycocholelate levels on malignant neoplasm of breast, HER-positive.**

| SNP         | beta_X   | se_X     | p_X      | or       | or_lci95 | or_uci95 | F        |
|-------------|----------|----------|----------|----------|----------|----------|----------|
| rs11590130  | 0.016348 | 0.201423 | 0.935312 | 1.016483 | 0.684928 | 1.508534 | 20.20511 |
| rs12455551  | -0.09816 | 0.199881 | 0.623366 | 0.906505 | 0.612671 | 1.341259 | 19.98324 |
| rs144012054 | -0.33053 | 0.254222 | 0.193543 | 0.718542 | 0.43657  | 1.182634 | 22.42442 |
| rs144846334 | -0.23794 | 0.243737 | 0.328958 | 0.788251 | 0.488868 | 1.270976 | 27.61669 |
| rs281377    | -0.23615 | 0.187632 | 0.208176 | 0.78966  | 0.546669 | 1.140658 | 24.39526 |
| rs3110095   | -0.2343  | 0.139719 | 0.093561 | 0.791128 | 0.60161  | 1.040346 | 43.51957 |
| rs3802548   | -0.01367 | 0.158    | 0.931068 | 0.986426 | 0.723723 | 1.344487 | 31.89631 |
| rs495360    | -0.02041 | 0.173046 | 0.906093 | 0.979793 | 0.697966 | 1.375417 | 27.15487 |
| rs55971546  | -0.31575 | 0.159354 | 0.04754  | 0.72924  | 0.533612 | 0.996586 | 37.17743 |
| rs6135632   | 0.05405  | 0.182769 | 0.767437 | 1.055537 | 0.737731 | 1.510252 | 20.60889 |
| rs62471957  | -0.29196 | 0.208418 | 0.161258 | 0.746796 | 0.496356 | 1.123598 | 26.20432 |
| rs62510166  | -0.31292 | 0.212843 | 0.141511 | 0.731309 | 0.481864 | 1.109882 | 20.35706 |
| rs6913415   | -0.08699 | 0.197944 | 0.660333 | 0.916689 | 0.621912 | 1.351186 | 20.66338 |
| rs74377562  | -0.32945 | 0.174815 | 0.059487 | 0.719318 | 0.51064  | 1.013273 | 25.87804 |
| rs79430699  | -0.00756 | 0.267961 | 0.977496 | 0.99247  | 0.586981 | 1.678072 | 20.31629 |
| rs80129176  | -0.17817 | 0.285062 | 0.531954 | 0.836799 | 0.478599 | 1.46309  | 22.44105 |

|                                 |          |          |          |          |          |          |    |
|---------------------------------|----------|----------|----------|----------|----------|----------|----|
| All - Inverse variance weighted | -0.16328 | 0.048004 | 0.000671 | 0.849354 | 0.773084 | 0.933148 | NA |
| All - MR Egger                  | -0.30179 | 0.105753 | 0.012756 | 0.739496 | 0.601059 | 0.909817 | NA |

Abbreviations: F: F-statistic; Beta\_X: genetic effect on Glycohyocholate levels; SE\_X: standard error of Beta\_X; p\_X: p-value for Beta\_X

**Supplementary Table 4. Genetic data for the MR on the effect of etiocholanolone glucuronide levels on malignant neoplasm of breast, HER-positive.**

| SNP                             | beta_X   | se_X     | p_X      | or       | or_lci95 | or_uci95 | F        |
|---------------------------------|----------|----------|----------|----------|----------|----------|----------|
| rs111975045                     | 0.095969 | 0.181569 | 0.597115 | 1.100725 | 0.771123 | 1.571209 | 20.9241  |
| rs112114309                     | -0.05323 | 0.191212 | 0.780736 | 0.948166 | 0.65181  | 1.379264 | 20.02932 |
| rs113018018                     | 0.343348 | 0.204587 | 0.093299 | 1.409659 | 0.943986 | 2.105051 | 22.52342 |
| rs117736840                     | 0.282134 | 0.258356 | 0.274818 | 1.325956 | 0.79912  | 2.200119 | 22.65326 |
| rs138529890                     | 0.339581 | 0.169448 | 0.045065 | 1.404359 | 1.007491 | 1.957561 | 50.75351 |
| rs141232858                     | 0.091693 | 0.050264 | 0.068119 | 1.096028 | 0.993198 | 1.209504 | 750.6996 |
| rs141909149                     | 0.48145  | 0.356618 | 0.177002 | 1.618419 | 0.80451  | 3.255746 | 20.04527 |
| rs148982377                     | 0.255139 | 0.090842 | 0.004976 | 1.290641 | 1.080138 | 1.542168 | 49.29313 |
| rs17339782                      | -0.48544 | 0.194454 | 0.012546 | 0.615428 | 0.420392 | 0.900949 | 19.7898  |
| rs231620                        | 0.047124 | 0.222408 | 0.832199 | 1.048252 | 0.677873 | 1.621001 | 19.54917 |
| rs28360521                      | 0.10378  | 0.269853 | 0.700549 | 1.109356 | 0.653684 | 1.882672 | 21.11227 |
| rs3857868                       | 0.271677 | 0.178246 | 0.127466 | 1.312163 | 0.925256 | 1.86086  | 32.03785 |
| rs4694077                       | -0.06806 | 0.21386  | 0.750293 | 0.934203 | 0.614327 | 1.420635 | 20.24474 |
| rs6698394                       | 0.070593 | 0.211988 | 0.739129 | 1.073145 | 0.708289 | 1.625945 | 22.94598 |
| rs72794638                      | -0.06825 | 0.19026  | 0.719797 | 0.934025 | 0.643289 | 1.35616  | 59.20234 |
| rs72941955                      | 0.249276 | 0.356158 | 0.483989 | 1.283096 | 0.638397 | 2.578857 | 20.43926 |
| rs75936454                      | 0.037777 | 0.183449 | 0.836848 | 1.0385   | 0.724856 | 1.487856 | 20.21996 |
| rs78320625                      | 0.28462  | 0.200691 | 0.156133 | 1.329257 | 0.896968 | 1.969884 | 19.72805 |
| rs8042104                       | 0.154115 | 0.214331 | 0.47211  | 1.166625 | 0.766459 | 1.775718 | 21.61875 |
| rs9957928                       | -0.06675 | 0.206792 | 0.746847 | 0.935427 | 0.623713 | 1.402926 | 24.8461  |
| All - Inverse variance weighted | 0.113156 | 0.035173 | 0.001295 | 1.119807 | 1.04521  | 1.199728 | NA       |
| All - MR Egger                  | 0.112137 | 0.053207 | 0.049354 | 1.118666 | 1.007882 | 1.241627 | NA       |

Abbreviations: F: F-statistic; Beta\_X: genetic effect on Etiocholanolone glucuronide levels; SE\_X: standard error of Beta\_X; p\_X: p-value for Beta\_X.

**Supplementary Table 5. Genetic data for the MR on the effect of vanillic acid glycine levels on malignant neoplasm of breast, HER-negative.**

| SNP         | beta_X   | se_X     | p_X      | or       | or_lci95 | or_uci95 | F        |
|-------------|----------|----------|----------|----------|----------|----------|----------|
| rs1047891   | 0.135427 | 0.241475 | 0.574912 | 1.145026 | 0.713292 | 1.838074 | 23.2309  |
| rs10845632  | 0.18359  | 0.228901 | 0.422525 | 1.201523 | 0.767163 | 1.881815 | 24.04263 |
| rs114538296 | -0.0399  | 0.176104 | 0.82074  | 0.960882 | 0.680404 | 1.356978 | 43.54908 |
| rs117841983 | -0.08292 | 0.13728  | 0.545846 | 0.920428 | 0.703291 | 1.204605 | 20.53855 |
| rs150827829 | 0.263888 | 0.205362 | 0.198797 | 1.301982 | 0.870557 | 1.94721  | 20.18708 |
| rs187352208 | 0.195583 | 0.056102 | 0.00049  | 1.21602  | 1.089396 | 1.357363 | 21.58818 |
| rs34199055  | 0.593037 | 0.225676 | 0.008593 | 1.809476 | 1.162662 | 2.816127 | 29.9908  |
| rs3799340   | -0.18685 | 0.17779  | 0.29328  | 0.829569 | 0.585484 | 1.175413 | 47.17725 |
| rs395438    | 0.167138 | 0.294723 | 0.570646 | 1.181917 | 0.663305 | 2.106011 | 21.08149 |

|                                 |          |          |          |          |          |          |          |
|---------------------------------|----------|----------|----------|----------|----------|----------|----------|
| rs4043197                       | -0.12212 | 0.324078 | 0.706305 | 0.885042 | 0.468924 | 1.670417 | 20.64513 |
| rs4355631                       | -0.15312 | 0.254099 | 0.546778 | 0.858028 | 0.521444 | 1.41187  | 20.46171 |
| rs55991483                      | -0.18764 | 0.257874 | 0.466845 | 0.828917 | 0.500039 | 1.3741   | 20.2511  |
| rs7143814                       | 0.416955 | 0.25529  | 0.102414 | 1.517334 | 0.919971 | 2.502581 | 21.81484 |
| rs72817365                      | 0.153579 | 0.205552 | 0.454969 | 1.166    | 0.779345 | 1.744487 | 20.86364 |
| rs73233368                      | -0.1427  | 0.266131 | 0.591816 | 0.867013 | 0.514624 | 1.460701 | 20.93719 |
| rs73432460                      | 0.308528 | 0.269    | 0.251405 | 1.361419 | 0.803553 | 2.306585 | 20.47054 |
| rs74970545                      | 0.133812 | 0.359918 | 0.710053 | 1.143178 | 0.564606 | 2.314634 | 25.15526 |
| rs7664352                       | 0.023403 | 0.277305 | 0.932743 | 1.023679 | 0.594452 | 1.762831 | 20.71519 |
| rs78850110                      | 0.068632 | 0.217174 | 0.751983 | 1.071042 | 0.699753 | 1.639338 | 22.50003 |
| rs7915981                       | -0.11412 | 0.262514 | 0.663762 | 0.89215  | 0.533312 | 1.492431 | 20.14542 |
| rs8106748                       | 0.156164 | 0.147007 | 0.288102 | 1.169018 | 0.876368 | 1.559395 | 59.55688 |
| rs9300713                       | 0.263685 | 0.249369 | 0.290325 | 1.301718 | 0.798454 | 2.122187 | 23.38335 |
| rs9835855                       | 0.293402 | 0.218799 | 0.179932 | 1.340981 | 0.873327 | 2.059057 | 21.18513 |
| All - Inverse variance weighted | 0.130564 | 0.035981 | 0.000285 | 1.139471 | 1.061881 | 1.22273  | NA       |
| All - MR Egger                  | 0.161645 | 0.052462 | 0.005663 | 1.175443 | 1.060585 | 1.30274  | NA       |

Abbreviations: F: F-statistic; Beta\_X: genetic effect on Vanillic acid glycine levels; SE\_X: standard error of Beta\_X; p\_X: p-value for Beta\_X.

**Supplementary Table 6. Genetic data for the MR on the effect of thyroxine levels on malignant neoplasm of breast, HER-negative.**

| SNP                             | beta_X   | se_X     | p_X      | or       | or_lci95 | or_uci95 | F        |
|---------------------------------|----------|----------|----------|----------|----------|----------|----------|
| rs10745656                      | 0.132547 | 0.317067 | 0.675917 | 1.141733 | 0.613298 | 2.125481 | 19.99626 |
| rs111892516                     | 0.129683 | 0.444183 | 0.770319 | 1.138467 | 0.476677 | 2.719045 | 20.35275 |
| rs114685250                     | 1.125    | 0.331035 | 0.000678 | 3.080218 | 1.6099   | 5.893373 | 21.67381 |
| rs1169288                       | -0.35188 | 0.221182 | 0.111631 | 0.703365 | 0.455939 | 1.085062 | 29.97077 |
| rs117341978                     | 0.37451  | 0.33825  | 0.268207 | 1.454279 | 0.749417 | 2.822095 | 19.96895 |
| rs117672019                     | 0.394313 | 0.9104   | 0.664927 | 1.483365 | 0.249058 | 8.834787 | 20.47427 |
| rs11779237                      | 0.352126 | 0.286673 | 0.219326 | 1.422088 | 0.810785 | 2.494291 | 23.69207 |
| rs13094078                      | 0.223959 | 0.183097 | 0.221264 | 1.25102  | 0.873794 | 1.791098 | 20.30568 |
| rs144476500                     | -0.13466 | 0.267005 | 0.614019 | 0.874011 | 0.51789  | 1.475014 | 26.22235 |
| rs146643391                     | 0.216047 | 0.25445  | 0.395839 | 1.241161 | 0.753765 | 2.043713 | 20.16352 |
| rs16844401                      | 0.434456 | 0.287088 | 0.130198 | 1.544122 | 0.879646 | 2.710538 | 21.95951 |
| rs17361586                      | 0.4097   | 0.359475 | 0.254404 | 1.506366 | 0.744628 | 3.047344 | 22.47474 |
| rs56357032                      | 0.425139 | 0.317509 | 0.180576 | 1.529803 | 0.821045 | 2.850391 | 21.10301 |
| rs58541168                      | 0.28832  | 0.180453 | 0.110096 | 1.334184 | 0.936723 | 1.900292 | 20.47729 |
| rs6078009                       | 0.560027 | 0.300191 | 0.062101 | 1.750721 | 0.972052 | 3.153147 | 23.04986 |
| rs6722076                       | 0.102134 | 0.190838 | 0.592519 | 1.107532 | 0.761925 | 1.609907 | 38.40639 |
| rs72869950                      | 0.542499 | 0.514439 | 0.291634 | 1.7203   | 0.627632 | 4.715236 | 20.67701 |
| rs73087204                      | 0.42326  | 0.226859 | 0.062078 | 1.526931 | 0.978842 | 2.381913 | 21.17641 |
| rs74454704                      | 0.082849 | 0.279324 | 0.766767 | 1.086378 | 0.62837  | 1.878222 | 21.44002 |
| rs78013831                      | 0.428069 | 0.202577 | 0.034591 | 1.534291 | 1.031504 | 2.282152 | 23.51178 |
| rs79132259                      | -0.36707 | 0.296642 | 0.215937 | 0.692764 | 0.387328 | 1.239058 | 19.56237 |
| All - Inverse variance weighted | 0.233614 | 0.066072 | 0.000407 | 1.263156 | 1.109726 | 1.4378   | NA       |
| All - MR Egger                  | 0.408993 | 0.16511  | 0.022814 | 1.505302 | 1.089129 | 2.080501 | NA       |

Abbreviations: F: F-statistic; Beta\_X: genetic effect on Thyroxine levels; SE\_X: standard error of Beta\_X; p\_X: p-value for Beta\_X.

**Supplementary Table 7. Genetic data for the MR on the effect of 1-palmitoyl-2-linoleoyl-GPI (16:0/18:2) levels on malignant neoplasm of breast, HER-negative.**

| SNP                             | beta_X   | se_X     | p_X      | or       | or_lci95 | or_uci95 | F        |
|---------------------------------|----------|----------|----------|----------|----------|----------|----------|
| rs10197694                      | 0.109425 | 0.267058 | 0.681994 | 1.115637 | 0.660995 | 1.882988 | 21.69864 |
| rs10468017                      | -0.00197 | 0.257232 | 0.993877 | 0.998028 | 0.602813 | 1.652353 | 21.12909 |
| rs113703749                     | 0.024403 | 0.355626 | 0.945293 | 1.024703 | 0.510367 | 2.057374 | 20.6024  |
| rs141418237                     | -0.32441 | 0.255004 | 0.203308 | 0.722952 | 0.438577 | 1.191718 | 20.0654  |
| rs144800978                     | 0.397625 | 0.5747   | 0.489011 | 1.488286 | 0.482494 | 4.59072  | 20.02776 |
| rs17119241                      | 0.021194 | 0.266099 | 0.936518 | 1.02142  | 0.606312 | 1.72073  | 22.05837 |
| rs174564                        | -0.14958 | 0.105179 | 0.154987 | 0.861071 | 0.700663 | 1.058203 | 128.2794 |
| rs192787921                     | -0.04159 | 0.143314 | 0.771667 | 0.959264 | 0.724348 | 1.270367 | 22.96185 |
| rs2045700                       | 0.009159 | 0.265864 | 0.972519 | 1.009201 | 0.599335 | 1.699362 | 21.36032 |
| rs2424708                       | -0.29237 | 0.202258 | 0.14831  | 0.746493 | 0.502181 | 1.109663 | 36.53821 |
| rs2701180                       | -0.4721  | 0.265588 | 0.075475 | 0.62369  | 0.370592 | 1.049645 | 21.15642 |
| rs390035                        | -0.27102 | 0.26163  | 0.300255 | 0.762602 | 0.456662 | 1.273509 | 21.8915  |
| rs554067                        | -0.28897 | 0.257274 | 0.261355 | 0.749036 | 0.452383 | 1.240219 | 22.33709 |
| rs56043834                      | -0.37799 | 0.264855 | 0.153532 | 0.685236 | 0.407748 | 1.151567 | 19.55945 |
| rs6133675                       | -0.30561 | 0.290871 | 0.29341  | 0.736674 | 0.416563 | 1.302776 | 21.32047 |
| rs641971                        | -0.24098 | 0.266641 | 0.366123 | 0.785858 | 0.465988 | 1.325297 | 19.77715 |
| rs6491411                       | -0.25384 | 0.280509 | 0.365514 | 0.77582  | 0.447699 | 1.34442  | 21.33727 |
| rs7412                          | -0.07137 | 0.270175 | 0.791666 | 0.931121 | 0.548313 | 1.581188 | 31.0331  |
| rs75917318                      | -0.39402 | 0.276574 | 0.154265 | 0.674344 | 0.392154 | 1.159595 | 21.64591 |
| rs78519165                      | 0.07761  | 0.246901 | 0.753266 | 1.080701 | 0.6661   | 1.753362 | 20.92825 |
| rs8736                          | -0.12695 | 0.097302 | 0.191987 | 0.880775 | 0.727846 | 1.065837 | 161.469  |
| All - Inverse variance weighted | -0.14864 | 0.045047 | 0.000968 | 0.861875 | 0.78904  | 0.941433 | NA       |
| All - MR Egger                  | -0.05745 | 0.100287 | 0.573469 | 0.94417  | 0.775682 | 1.149256 | NA       |

Abbreviations: F: F-statistic; Beta\_X: genetic effect on 1-palmitoyl-2-linoleoyl-GPI (16:0/18:2) levels; SE\_X: standard error of Beta\_X; p\_X: p-value for Beta\_X.

**Supplementary Table 8. Genetic data for the MR on the effect of N-acetylphenylalanine levels on malignant neoplasm of breast, HER-negative.**

| SNP         | beta_X   | se_X     | p_X      | or       | or_lci95 | or_uci95 | F        |
|-------------|----------|----------|----------|----------|----------|----------|----------|
| rs10436897  | 0.162257 | 0.371858 | 0.662588 | 1.176163 | 0.567461 | 2.437806 | 19.53623 |
| rs111528892 | 0.273874 | 0.417734 | 0.512069 | 1.31505  | 0.579909 | 2.982116 | 20.47289 |
| rs116075297 | 0.154515 | 0.169156 | 0.361007 | 1.167092 | 0.837754 | 1.625901 | 19.79232 |
| rs117013634 | 0.172937 | 0.365399 | 0.636012 | 1.188791 | 0.58086  | 2.432984 | 19.79306 |
| rs12444803  | 0.212904 | 0.272664 | 0.434903 | 1.237266 | 0.725048 | 2.111346 | 21.77973 |
| rs138252727 | -0.09767 | 0.221159 | 0.658771 | 0.906951 | 0.587935 | 1.399068 | 19.50911 |
| rs139658164 | -0.22814 | 0.427795 | 0.593832 | 0.796013 | 0.34417  | 1.841056 | 23.5126  |
| rs149251158 | -0.17558 | 0.17629  | 0.319264 | 0.83897  | 0.593862 | 1.185244 | 36.48982 |
| rs17707159  | 0.025432 | 0.291646 | 0.93051  | 1.025758 | 0.57915  | 1.816768 | 20.4308  |
| rs2010501   | 0.039769 | 0.272372 | 0.883914 | 1.04057  | 0.610132 | 1.774676 | 19.66764 |
| rs2149614   | 0.329545 | 0.280591 | 0.240207 | 1.390336 | 0.802188 | 2.409702 | 20.63435 |
| rs2328895   | 0.082115 | 0.133183 | 0.537526 | 1.085581 | 0.83617  | 1.409386 | 98.4315  |
| rs2360636   | 0.508759 | 0.284186 | 0.073416 | 1.663226 | 0.9529   | 2.903052 | 21.86603 |
| rs3763785   | 0.358775 | 0.266672 | 0.178502 | 1.431575 | 0.848826 | 2.414402 | 20.44586 |

|                                    |          |          |          |          |          |          |          |
|------------------------------------|----------|----------|----------|----------|----------|----------|----------|
| rs61757081                         | 0.426654 | 0.320268 | 0.182803 | 1.532122 | 0.817853 | 2.870193 | 22.4386  |
| rs62576887                         | -0.17678 | 0.329819 | 0.59197  | 0.837966 | 0.439015 | 1.599463 | 20.03196 |
| rs6868892                          | 0.44287  | 0.288824 | 0.125188 | 1.557171 | 0.884064 | 2.742765 | 20.16622 |
| rs7108760                          | 0.041507 | 0.115648 | 0.719663 | 1.042381 | 0.830968 | 1.30758  | 179.082  |
| rs72870683                         | 0.114036 | 0.266764 | 0.669031 | 1.120792 | 0.664433 | 1.890599 | 25.41432 |
| rs7604588                          | 0.128698 | 0.044702 | 0.00399  | 1.137346 | 1.041937 | 1.241493 | 926.7864 |
| rs76260331                         | -0.04938 | 0.329861 | 0.881006 | 0.951821 | 0.498623 | 1.816931 | 19.96712 |
| rs79031621                         | 0.033579 | 0.252513 | 0.894209 | 1.03415  | 0.630434 | 1.696395 | 20.27854 |
| rs9852875                          | -0.02209 | 0.443771 | 0.960295 | 0.97815  | 0.409883 | 2.334268 | 21.30936 |
| rs9957535                          | 0.042629 | 0.344942 | 0.901645 | 1.043551 | 0.530754 | 2.051795 | 21.09939 |
| All - Inverse<br>variance weighted | 0.112196 | 0.033219 | 0.000731 | 1.118733 | 1.048214 | 1.193995 | NA       |
| All - MR Egger                     | 0.070678 | 0.052114 | 0.18879  | 1.073235 | 0.969024 | 1.188655 | NA       |

Abbreviations: F: F-statistic; Beta\_X: genetic effect on N-acetylphenylalanine levels; SE\_X: standard error of Beta\_X; p\_X: p-value for Beta\_X.

**Supplementary Table 9. Genetic data for the MR on the effect of glucose-to-mannose ratio on malignant neoplasm of breast, HER-negative.**

| SNP         | beta_X   | se_X     | p_X      | or       | or_lci95 | or_uci95 | F        |
|-------------|----------|----------|----------|----------|----------|----------|----------|
| rs10487783  | 0.184665 | 0.313782 | 0.556187 | 1.202816 | 0.650283 | 2.224824 | 19.95859 |
| rs11076008  | 0.004923 | 0.305119 | 0.987127 | 1.004935 | 0.552605 | 1.827515 | 19.71775 |
| rs11147164  | -0.02491 | 0.185323 | 0.89307  | 0.975396 | 0.678314 | 1.402593 | 21.8003  |
| rs11183167  | 0.192068 | 0.239798 | 0.423157 | 1.211753 | 0.757345 | 1.938806 | 21.86084 |
| rs1260326   | 0.162462 | 0.070699 | 0.021566 | 1.176403 | 1.024179 | 1.351254 | 335.8678 |
| rs1260815   | 0.027013 | 0.300905 | 0.928469 | 1.027381 | 0.569634 | 1.852964 | 19.59771 |
| rs13151496  | 0.260273 | 0.211747 | 0.219007 | 1.297285 | 0.856629 | 1.964616 | 21.39685 |
| rs140698139 | 0.204595 | 0.270158 | 0.44886  | 1.227028 | 0.722589 | 2.083616 | 19.95859 |
| rs141341042 | 0.121498 | 0.20112  | 0.545774 | 1.129187 | 0.761323 | 1.674799 | 20.49849 |
| rs1434218   | 0.117687 | 0.277163 | 0.671119 | 1.124892 | 0.653409 | 1.936585 | 20.55981 |
| rs144226876 | 0.170973 | 0.309431 | 0.580578 | 1.186459 | 0.646933 | 2.175934 | 20.58319 |
| rs144897897 | -0.04263 | 0.249589 | 0.864376 | 0.958265 | 0.587532 | 1.56293  | 20.20088 |
| rs146434711 | 0.094234 | 0.22554  | 0.676081 | 1.098817 | 0.706223 | 1.709656 | 19.63824 |
| rs1868856   | 0.241477 | 0.265734 | 0.363499 | 1.273128 | 0.756267 | 2.143232 | 20.31357 |
| rs2897514   | -0.08285 | 0.281854 | 0.768795 | 0.920488 | 0.529785 | 1.599325 | 20.02076 |
| rs407109    | -0.13179 | 0.298444 | 0.658786 | 0.876525 | 0.488342 | 1.573275 | 22.50079 |
| rs4143117   | 0.190045 | 0.255668 | 0.457284 | 1.209304 | 0.732666 | 1.996019 | 19.71288 |
| rs56243479  | 0.224412 | 0.225723 | 0.32013  | 1.251586 | 0.804121 | 1.94805  | 21.52789 |
| rs60314390  | -0.03039 | 0.234005 | 0.896663 | 0.970065 | 0.613213 | 1.534583 | 20.90927 |
| rs73430632  | 0.175201 | 0.303778 | 0.564114 | 1.191486 | 0.656914 | 2.161073 | 20.27928 |
| rs74833360  | 0.185068 | 0.274262 | 0.499813 | 1.2033   | 0.702938 | 2.059827 | 23.65132 |
| rs75139539  | 0.046835 | 0.226002 | 0.83583  | 1.047949 | 0.672919 | 1.631989 | 21.07131 |
| rs7818895   | 0.434803 | 0.275897 | 0.115035 | 1.544659 | 0.899465 | 2.652654 | 20.06782 |
| rs79405811  | 0.189572 | 0.207939 | 0.361941 | 1.208733 | 0.804135 | 1.816902 | 21.77785 |
| rs8049404   | 0.308263 | 0.265143 | 0.244981 | 1.361058 | 0.809435 | 2.288608 | 22.3594  |
| rs977895    | 0.108016 | 0.296469 | 0.715602 | 1.114066 | 0.623091 | 1.991914 | 20.22298 |

|                                 |          |          |          |          |          |          |    |
|---------------------------------|----------|----------|----------|----------|----------|----------|----|
| All - Inverse variance weighted | 0.137918 | 0.040991 | 0.000767 | 1.147881 | 1.059266 | 1.24391  | NA |
| All - MR Egger                  | 0.132366 | 0.080175 | 0.111774 | 1.141526 | 0.975527 | 1.335773 | NA |

Abbreviations: F: F-statistic; Beta\_X: genetic effect on Glucose-to-mannose ratio; SE\_X: standard error of Beta\_X; p\_X: p-value for Beta\_X.

**Supplementary Table 10. Genetic data for the MR on the effect of gamma-glutamyl glutamate levels on malignant neoplasm of breast, HER-positive.**

| SNP                             | beta_X   | se_X     | p_X      | or       | or_lci95 | or_uci95 | F        |
|---------------------------------|----------|----------|----------|----------|----------|----------|----------|
| rs10918906                      | 0.224046 | 0.210365 | 0.286859 | 1.251129 | 0.828392 | 1.889591 | 23.65602 |
| rs10948077                      | 0.109634 | 0.199475 | 0.582584 | 1.11587  | 0.754774 | 1.64972  | 41.30163 |
| rs113421406                     | -0.16811 | 0.442487 | 0.703996 | 0.845257 | 0.355088 | 2.012061 | 19.82452 |
| rs113558190                     | 0.01412  | 0.260835 | 0.95683  | 1.01422  | 0.608282 | 1.691061 | 20.01361 |
| rs113567875                     | 1.18976  | 0.474075 | 0.012085 | 3.286294 | 1.297674 | 8.322374 | 20.41966 |
| rs113874211                     | -0.75929 | 0.414896 | 0.06724  | 0.467999 | 0.207529 | 1.055388 | 21.30396 |
| rs117838486                     | 0.457242 | 0.354576 | 0.197208 | 1.579712 | 0.788418 | 3.165184 | 19.57548 |
| rs12628903                      | 1.549331 | 0.696083 | 0.026029 | 4.708318 | 1.203229 | 18.42398 | 21.02661 |
| rs1324191                       | 0.376135 | 0.304447 | 0.216656 | 1.456644 | 0.802053 | 2.645476 | 19.93714 |
| rs13385401                      | 0.077626 | 0.290218 | 0.789103 | 1.080719 | 0.611891 | 1.908759 | 23.87765 |
| rs1410284                       | 0.230933 | 0.212766 | 0.277752 | 1.259775 | 0.8302   | 1.911628 | 27.36363 |
| rs142947473                     | -0.00357 | 0.267129 | 0.989333 | 0.996435 | 0.590289 | 1.682029 | 21.23784 |
| rs1479402                       | -0.03973 | 0.404449 | 0.92174  | 0.961045 | 0.434981 | 2.12333  | 19.67343 |
| rs1702339                       | -0.41855 | 0.437569 | 0.338807 | 0.658003 | 0.279102 | 1.551294 | 20.34053 |
| rs17729572                      | 0.22393  | 0.331842 | 0.499797 | 1.250984 | 0.652803 | 2.397294 | 20.49173 |
| rs1937855                       | -0.0792  | 0.261496 | 0.761977 | 0.923852 | 0.553367 | 1.542382 | 22.24685 |
| rs2209169                       | 0.301682 | 0.278392 | 0.278516 | 1.352132 | 0.783514 | 2.333411 | 20.23599 |
| rs34618040                      | 0.194237 | 0.237317 | 0.413087 | 1.214384 | 0.76269  | 1.93359  | 20.76366 |
| rs3859862                       | 0.045667 | 0.185696 | 0.805742 | 1.046726 | 0.727387 | 1.506261 | 46.12258 |
| rs4781721                       | 0.637161 | 0.240791 | 0.008142 | 1.891104 | 1.179641 | 3.031662 | 25.23359 |
| rs541090833                     | 0.282286 | 0.32908  | 0.391    | 1.326158 | 0.695788 | 2.52763  | 19.67458 |
| rs72768751                      | 0.617449 | 0.382692 | 0.10665  | 1.854193 | 0.875791 | 3.925628 | 21.30536 |
| rs74622465                      | -0.61806 | 0.327021 | 0.05876  | 0.538987 | 0.283931 | 1.023161 | 21.42821 |
| rs7614103                       | -0.0383  | 0.272212 | 0.888105 | 0.962423 | 0.564488 | 1.640882 | 21.59485 |
| rs76502482                      | -0.04564 | 0.407468 | 0.910824 | 0.95539  | 0.42987  | 2.123363 | 24.79271 |
| All - Inverse variance weighted | 0.142585 | 0.066054 | 0.030881 | 1.153251 | 1.013205 | 1.312655 | NA       |
| All - MR Egger                  | 0.014249 | 0.181106 | 0.937971 | 1.014351 | 0.711259 | 1.4466   | NA       |

Abbreviations: F: F-statistic; Beta\_X: genetic effect on Gamma-glutamyl glutamate levels; SE\_X: standard error of Beta\_X; p\_X: p-value for Beta\_X.

**Supplementary Table 11. Genetic data for the MR on the effect of X-12849 levels on malignant neoplasm of breast, HER-positive.**

| SNP         | beta_X   | se_X     | p_X      | or       | or_lci95 | or_uci95 | F        |
|-------------|----------|----------|----------|----------|----------|----------|----------|
| rs111295425 | -0.06402 | 0.182714 | 0.72607  | 0.93799  | 0.655645 | 1.341925 | 20.29968 |
| rs11487435  | 0.067219 | 0.272789 | 0.805362 | 1.06953  | 0.6266   | 1.825556 | 22.24892 |
| rs12872612  | -0.2033  | 0.274097 | 0.458272 | 0.816036 | 0.476862 | 1.396451 | 20.78645 |
| rs13386620  | 0.249797 | 0.255629 | 0.328479 | 1.283764 | 0.777838 | 2.118758 | 22.27942 |

|                                    |          |          |          |          |          |          |          |
|------------------------------------|----------|----------|----------|----------|----------|----------|----------|
| rs150860204                        | -0.59147 | 0.445726 | 0.184516 | 0.553514 | 0.231057 | 1.325982 | 21.76679 |
| rs17091434                         | 0.176696 | 0.238975 | 0.459668 | 1.193268 | 0.746997 | 1.906152 | 21.36393 |
| rs186129911                        | 0.017042 | 0.138513 | 0.902078 | 1.017188 | 0.775347 | 1.334463 | 22.59548 |
| rs1876254                          | 0.234897 | 0.257684 | 0.361995 | 1.264778 | 0.763255 | 2.095845 | 20.97361 |
| rs2206890                          | -0.3582  | 0.295554 | 0.225522 | 0.698931 | 0.39161  | 1.247425 | 21.18312 |
| rs2833587                          | -0.04387 | 0.23544  | 0.852179 | 0.957077 | 0.603304 | 1.5183   | 24.97789 |
| rs2916610                          | -0.60233 | 0.228838 | 0.008485 | 0.547533 | 0.349639 | 0.857435 | 20.17495 |
| rs2942211                          | -0.05053 | 0.256245 | 0.843681 | 0.950727 | 0.575355 | 1.570999 | 19.55932 |
| rs35326271                         | 0.11037  | 0.262913 | 0.674635 | 1.116691 | 0.667018 | 1.869513 | 21.37654 |
| rs3828210                          | -0.00436 | 0.289035 | 0.987953 | 0.995645 | 0.565032 | 1.754432 | 20.36693 |
| rs62321483                         | -0.06282 | 0.24128  | 0.79459  | 0.939114 | 0.585244 | 1.506953 | 19.66226 |
| rs6716856                          | -0.22686 | 0.296503 | 0.444199 | 0.797031 | 0.445745 | 1.425161 | 21.91351 |
| rs72611556                         | -0.13348 | 0.132526 | 0.313833 | 0.875044 | 0.674872 | 1.134587 | 21.28985 |
| rs73115392                         | -0.54438 | 0.265697 | 0.040473 | 0.5802   | 0.344677 | 0.97666  | 21.38965 |
| rs76447666                         | -0.3912  | 0.526486 | 0.457459 | 0.676246 | 0.240963 | 1.897834 | 20.85577 |
| rs76738915                         | -0.09551 | 0.386448 | 0.804789 | 0.908907 | 0.426156 | 1.938521 | 20.90233 |
| rs79918116                         | -0.6315  | 0.341097 | 0.064113 | 0.531792 | 0.272518 | 1.037741 | 20.14291 |
| rs9531784                          | -0.39232 | 0.26643  | 0.140889 | 0.675491 | 0.40071  | 1.1387   | 20.4065  |
| All - Inverse<br>variance weighted | -0.11167 | 0.05099  | 0.028522 | 0.89434  | 0.809281 | 0.988339 | NA       |
| All - MR Egger                     | -0.1982  | 0.103165 | 0.06907  | 0.820203 | 0.670047 | 1.004007 | NA       |

Abbreviations: F: F-statistic; Beta\_X: genetic effect on X-12849 levels; SE\_X: standard error of Beta\_X; p\_X: p-value for Beta\_X.

**Supplementary Table 12. Genetic data for the MR on the effect of gamma-glutamyl glutamate levels on malignant neoplasm of breast, HER-negative.**

| SNP         | beta_X   | se_X     | p_X      | or       | or_lci95 | or_uci95 | F        |
|-------------|----------|----------|----------|----------|----------|----------|----------|
| rs10918906  | 0.101604 | 0.167793 | 0.544828 | 1.106944 | 0.796705 | 1.537992 | 23.65602 |
| rs10948077  | 0.246031 | 0.159203 | 0.122253 | 1.278939 | 0.936124 | 1.747296 | 41.30163 |
| rs113421406 | -0.25568 | 0.356973 | 0.473842 | 0.77439  | 0.384679 | 1.558913 | 19.82452 |
| rs113558190 | -0.13508 | 0.207103 | 0.514245 | 0.873645 | 0.582164 | 1.311066 | 20.01361 |
| rs113567875 | 0.048458 | 0.382438 | 0.899172 | 1.049651 | 0.496029 | 2.221174 | 20.41966 |
| rs113874211 | -0.1038  | 0.336623 | 0.757813 | 0.901406 | 0.465995 | 1.743652 | 21.30396 |
| rs117838486 | 0.21209  | 0.284623 | 0.456174 | 1.236259 | 0.707675 | 2.159658 | 19.57548 |
| rs12628903  | -0.52952 | 0.569359 | 0.352353 | 0.588886 | 0.192922 | 1.797542 | 21.02661 |
| rs1324191   | 0.367854 | 0.243098 | 0.130231 | 1.444632 | 0.897073 | 2.32641  | 19.93714 |
| rs13385401  | -0.07421 | 0.232106 | 0.749172 | 0.928475 | 0.589112 | 1.463331 | 23.87765 |
| rs1410284   | 0.240185 | 0.16971  | 0.15699  | 1.271484 | 0.911698 | 1.773254 | 27.36363 |
| rs142947473 | -0.03101 | 0.213287 | 0.884417 | 0.96947  | 0.638235 | 1.47261  | 21.23784 |
| rs1479402   | -0.53154 | 0.327986 | 0.105101 | 0.5877   | 0.309007 | 1.117746 | 19.67343 |
| rs1702339   | -0.00303 | 0.349937 | 0.993084 | 0.996971 | 0.502123 | 1.979499 | 20.34053 |
| rs17729572  | -0.16542 | 0.264892 | 0.532323 | 0.847541 | 0.504289 | 1.424432 | 20.49173 |
| rs1937855   | 0.449422 | 0.208256 | 0.030925 | 1.567406 | 1.042103 | 2.357504 | 22.24685 |
| rs2209169   | -0.02698 | 0.222324 | 0.903418 | 0.973383 | 0.62956  | 1.504977 | 20.23599 |
| rs34618040  | 0.039344 | 0.189479 | 0.83551  | 1.040128 | 0.717462 | 1.507907 | 20.76366 |
| rs3859862   | 0.080187 | 0.148064 | 0.588116 | 1.08349  | 0.810569 | 1.448304 | 46.12258 |
| rs4781721   | 0.260756 | 0.19233  | 0.175171 | 1.29791  | 0.890287 | 1.892166 | 25.23359 |
| rs541090833 | 0.236721 | 0.264961 | 0.371635 | 1.267087 | 0.753819 | 2.129835 | 19.67458 |



|                                 |          |          |          |          |          |          |          |
|---------------------------------|----------|----------|----------|----------|----------|----------|----------|
| rs72768751                      | -0.07131 | 0.304854 | 0.815062 | 0.931177 | 0.512313 | 1.692501 | 21.30536 |
| rs74622465                      | 0.192225 | 0.259384 | 0.458642 | 1.211944 | 0.728938 | 2.014997 | 21.42821 |
| rs7614103                       | 0.222893 | 0.217264 | 0.304935 | 1.249687 | 0.816324 | 1.913111 | 21.59485 |
| rs76502482                      | -0.17329 | 0.324639 | 0.593476 | 0.84089  | 0.445042 | 1.588832 | 24.79271 |
| All - Inverse variance weighted | 0.092333 | 0.045861 | 0.044082 | 1.09673  | 1.002448 | 1.199879 | NA       |
| All - MR Egger                  | -0.15293 | 0.125031 | 0.233654 | 0.858187 | 0.671666 | 1.096505 | NA       |

Abbreviations: F: F-statistic; Beta\_X: genetic effect on Gamma-glutamyl glutamate levels; SE\_X: standard error of Beta\_X; p\_X: p-value for Beta\_X.

**Supplementary Table 13. Genetic data for the MR on the effect of X-12849 levels on malignant neoplasm of breast, HER-negative.**

|                                 | beta_X   | se_X     | p_X      | or       | or_lci95 | or_uci95 | F        |
|---------------------------------|----------|----------|----------|----------|----------|----------|----------|
| rs111295425                     | -0.12127 | 0.145564 | 0.404772 | 0.885792 | 0.665925 | 1.178251 | 20.29968 |
| rs11487435                      | -0.27573 | 0.218024 | 0.205987 | 0.759018 | 0.49507  | 1.163691 | 22.24892 |
| rs12872612                      | -0.08852 | 0.217982 | 0.684689 | 0.915288 | 0.597045 | 1.403163 | 20.78645 |
| rs13386620                      | 0.076545 | 0.203647 | 0.707012 | 1.079551 | 0.724261 | 1.609131 | 22.27942 |
| rs150860204                     | -0.40261 | 0.362336 | 0.266509 | 0.668576 | 0.328643 | 1.36012  | 21.76679 |
| rs17091434                      | 0.03062  | 0.190521 | 0.872317 | 1.031094 | 0.709779 | 1.497866 | 21.36393 |
| rs186129911                     | -0.10676 | 0.109875 | 0.331241 | 0.898745 | 0.724618 | 1.114714 | 22.59548 |
| rs1876254                       | 0.300179 | 0.205333 | 0.143765 | 1.350101 | 0.902783 | 2.01906  | 20.97361 |
| rs2206890                       | 0.022434 | 0.23593  | 0.924247 | 1.022687 | 0.644044 | 1.623941 | 21.18312 |
| rs2833587                       | -0.12703 | 0.187742 | 0.498658 | 0.88071  | 0.60957  | 1.272455 | 24.97789 |
| rs2916610                       | -0.02975 | 0.179851 | 0.868629 | 0.970691 | 0.682321 | 1.380934 | 20.17495 |
| rs2942211                       | 0.141589 | 0.204329 | 0.488343 | 1.152103 | 0.771904 | 1.719569 | 19.55932 |
| rs35326271                      | -0.00962 | 0.209668 | 0.963397 | 0.990424 | 0.656672 | 1.493806 | 21.37654 |
| rs3828210                       | -0.46252 | 0.231383 | 0.045617 | 0.629697 | 0.400105 | 0.991034 | 20.36693 |
| rs62321483                      | 0.028356 | 0.192333 | 0.882793 | 1.028761 | 0.705663 | 1.499796 | 19.66226 |
| rs6716856                       | -0.44285 | 0.235426 | 0.059964 | 0.642204 | 0.404832 | 1.018759 | 21.91351 |
| rs72611556                      | -0.11802 | 0.105711 | 0.264224 | 0.888676 | 0.722372 | 1.093268 | 21.28985 |
| rs73115392                      | -0.10132 | 0.21201  | 0.632719 | 0.903644 | 0.596391 | 1.369189 | 21.38965 |
| rs76447666                      | 0.591765 | 0.425366 | 0.164168 | 1.807175 | 0.785093 | 4.159867 | 20.85577 |
| rs76738915                      | 0.027982 | 0.30992  | 0.928059 | 1.028377 | 0.5602   | 1.887823 | 20.90233 |
| rs79918116                      | -0.78018 | 0.284595 | 0.006118 | 0.458323 | 0.262373 | 0.800616 | 20.14291 |
| rs9531784                       | 0.047001 | 0.212845 | 0.82523  | 1.048123 | 0.690614 | 1.590703 | 20.4065  |
| All - Inverse variance weighted | -0.0829  | 0.041897 | 0.047855 | 0.920443 | 0.847877 | 0.999219 | NA       |
| All - MR Egger                  | -0.163   | 0.084382 | 0.067685 | 0.849587 | 0.720079 | 1.002387 | NA       |

Abbreviations: F: F-statistic; Beta\_X: genetic effect on X-12849 levels; SE\_X: standard error of Beta\_X; p\_X: p-value for Beta\_X.

**Supplementary Table 14. Sensitivity analyses of metabolites on malignant neoplasm of breast, HER-positive.**

| Exposure                       | Outcome                                    | Number of IVs | Method   | Heterogeneity test |          | MR-Egger pleiotropy test |          | MR-PRESSO global outlier test |         |         |
|--------------------------------|--------------------------------------------|---------------|----------|--------------------|----------|--------------------------|----------|-------------------------------|---------|---------|
|                                |                                            |               |          | Q                  | p-value  | Intercept                | p-value  | RSSobs                        | p-value | Outlier |
| Epiandrosterone sulfate levels | Malignant neoplasm of breast, HER-negative | 24            | MR Egger | 25.87971           | 0.256882 | 0.000152                 | 0.9805   | 27.17973                      | 0.487   | None    |
|                                |                                            |               | IVW      | 25.88043           | 0.306543 |                          |          |                               |         |         |
| 5alpha-androstan-              | Malignant neoplasm of                      | 31            | MR Egger | 31.6985            | 0.333262 | 0.00356                  | 0.553914 | 32.80531                      | 0.52    | None    |

|                                          |                                            |    |          |          |          |          |          |          |       |      |
|------------------------------------------|--------------------------------------------|----|----------|----------|----------|----------|----------|----------|-------|------|
| 3beta,17beta-diol monosulfate (2) levels | breast, HER-negative                       |    | IVW      | 32.09051 | 0.36333  |          |          |          |       |      |
| Glycohyocholate levels                   | Malignant neoplasm of breast, HER-negative | 16 | MR Egger | 5.852484 | 0.970074 | 0.018193 | 0.163704 | 9.274069 | 0.919 | None |
|                                          |                                            |    | IVW      | 8.013065 | 0.923258 |          |          |          |       |      |
| Etiocolanolone glucuronide levels        | Malignant neoplasm of breast, HER-negative | 20 | MR Egger | 21.79846 | 0.241056 | 0.000248 | 0.979458 | 24.06592 | 0.347 | None |
|                                          |                                            |    | IVW      | 21.79928 | 0.294359 |          |          |          |       |      |

**Supplementary Table 15. Sensitivity analyses of metabolites on malignant neoplasm of breast, HER-negative.**

| Exposure                                       | Outcome                                    | Number of IVs | Method   | Heterogeneity test |                 | MR-Egger pleiotropy test |                 | MR-PRESSO global outlier test |                 |         |
|------------------------------------------------|--------------------------------------------|---------------|----------|--------------------|-----------------|--------------------------|-----------------|-------------------------------|-----------------|---------|
|                                                |                                            |               |          | <i>Q</i>           | <i>p</i> -value | Intercept                | <i>p</i> -value | RSSobs                        | <i>p</i> -value | Outlier |
| Vanillic acid glycine levels                   | Malignant neoplasm of breast, HER-negative | 23            | MR Egger | 20.02221           | 0.519855        | -0.00709                 | 0.42472         | 24.52811                      | 0.521           | None    |
|                                                |                                            |               | IVW      | 20.68498           | 0.540273        |                          |                 |                               |                 |         |
| Thyroxine levels                               | Malignant neoplasm of breast, HER-negative | 21            | MR Egger | 24.20825           | 0.188285        | -0.02834                 | 0.261528        | 28.62793                      | 0.215           | None    |
|                                                |                                            |               | IVW      | 25.91447           | 0.168655        |                          |                 |                               |                 |         |
| 1-palmitoyl-2-linoleoyl-GPI (16:0/18:2) levels | Malignant neoplasm of breast, HER-negative | 21            | MR Egger | 8.720561           | 0.977838        | -0.0128                  | 0.321558        | 10.44594                      | 0.982           | None    |
|                                                |                                            |               | IVW      | 9.756483           | 0.972376        |                          |                 |                               |                 |         |
| N-acetylphenylalanine levels                   | Malignant neoplasm of breast, HER-negative | 24            | MR Egger | 11.15759           | 0.972428        | 0.010031                 | 0.31239         | 13.29427                      | 0.973           | None    |
|                                                |                                            |               | IVW      | 12.22665           | 0.966824        |                          |                 |                               |                 |         |
| Glucose-to-mannose ratio                       | Malignant neoplasm of breast, HER-negative | 26            | MR Egger | 6.401489           | 0.99987         | 0.000908                 | 0.936455        | 6.924869                      | 1               | None    |
|                                                |                                            |               | IVW      | 6.40798            | 0.999935        |                          |                 |                               |                 |         |

**Supplementary Table 16. Sensitivity analyses of metabolites on malignant neoplasm of breast, HER-positive/negative.**

| Exposure                        | Outcome                                    | Number of IVs | Method   | Heterogeneity test |                 | MR-Egger pleiotropy test |                 | MR-PRESSO global outlier test |                 |         |
|---------------------------------|--------------------------------------------|---------------|----------|--------------------|-----------------|--------------------------|-----------------|-------------------------------|-----------------|---------|
|                                 |                                            |               |          | <i>Q</i>           | <i>p</i> -value | Intercept                | <i>p</i> -value | RSSobs                        | <i>p</i> -value | Outlier |
| Gamma-glutamyl glutamate levels | Malignant neoplasm of breast, HER-positive | 25            | MR Egger | 13.74344           | 0.933983        | 0.028479                 | 0.046076        | 19.61343                      | 0.83            | None    |
|                                 |                                            |               | IVW      | 18.18968           | 0.793711        |                          |                 |                               |                 |         |
| X-12849 levels                  | Malignant neoplasm of breast, HER-positive | 22            | MR Egger | 21.04402           | 0.394546        | 0.012455                 | 0.287808        | 23.64717                      | 0.447           | None    |
|                                 |                                            |               | IVW      | 22.29876           | 0.382472        |                          |                 |                               |                 |         |
| Gamma-glutamyl glutamate levels | Malignant neoplasm of breast, HER-negative | 25            | MR Egger | 30.99398           | 0.122941        | 0.014923                 | 0.453749        | 33.63561                      | 0.166           | None    |
|                                 |                                            |               | IVW      | 31.77663           | 0.132629        |                          |                 |                               |                 |         |
| X-12849 levels                  | Malignant neoplasm of breast, HER-negative | 22            | MR Egger | 19.83662           | 0.468191        | 0.013453                 | 0.34612         | 0.514                         | 22.64835        | None    |
|                                 |                                            |               | IVW      | 20.76764           | 0.473211        |                          |                 |                               |                 |         |
